# Supplementary material for: Achieving color-tunable luminescence in CaF 2 :Eu phosphors for multimode anti-counterfeiting
Source: Royal Society of Chemistry journal article supplement (doi:10.1039/d4tc03365e), 2024-01-01
Supplement: d4tc03365e1.pdf [file d4tc03365e1.pdf]

**Achieving Color-tunable Luminescence in CaF<sub>2</sub>: Eu Phosphor for Multimode  
Anti-counterfeiting**

*Linglu Kuang<sup>a</sup>, Feng Zhang<sup>b</sup>, Jian Zhang<sup>a</sup>, Xiaodie Zhu<sup>a</sup>, Xu Tian<sup>c</sup>, Jianxiong Shao<sup>d</sup>,  
Yichun Liu<sup>a\*</sup>, Xuhui Xu<sup>a</sup>, Zhichao Liu<sup>a\*</sup>,*

*<sup>a</sup> Yunnan Joint International Laboratory of Optoelectronic Materials and Devices,  
Faculty of Materials Science and Engineering, Kunming University of Science and  
Technology, Kunming 650093, Yunnan, China*

*<sup>b</sup> School of Future Technology, Henan University, Kaifeng 475001, Henan, China*

*<sup>c</sup> School of Materials and Energy, Yunnan University, Kunming 650504, Yunnan, China*

*<sup>d</sup> Department of Modern Physics, Lanzhou University, Lanzhou 730000, Lanzhou,  
China.*

*\* Corresponding Author: Zhichao Liu, E-mails: [liuzhichzo1028@126.com](mailto:liuzhichzo1028@126.com)*

*Yichun Liu, E-mails: [spsjtu@163.com](mailto:spsjtu@163.com)*

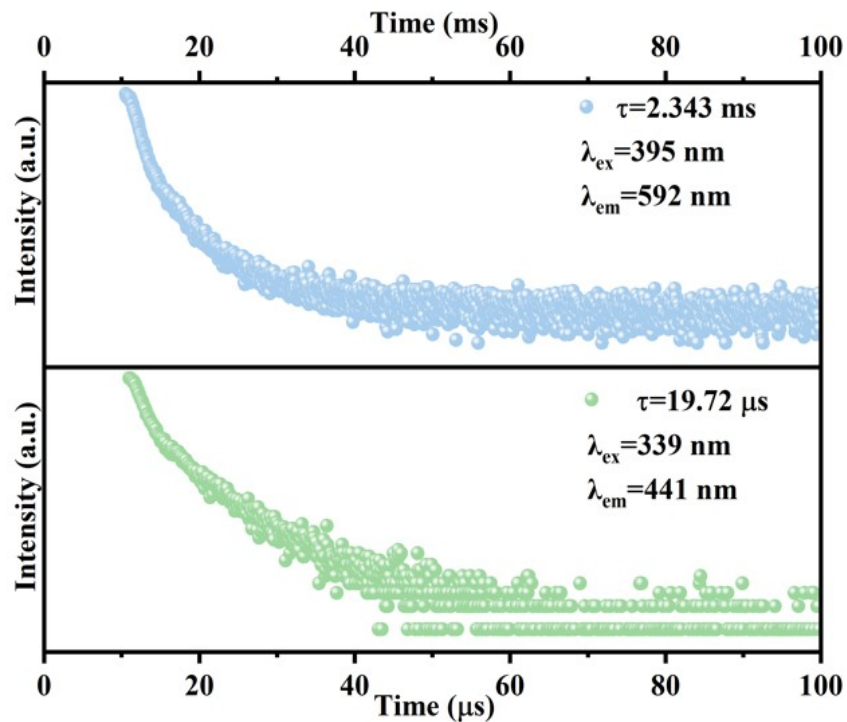

**Fig. S1.** Time luminescence decay curves of  $\text{CaF}_2: 0.5\% \text{Eu}$  under the emissions at 592 and 441 nm, respectively.

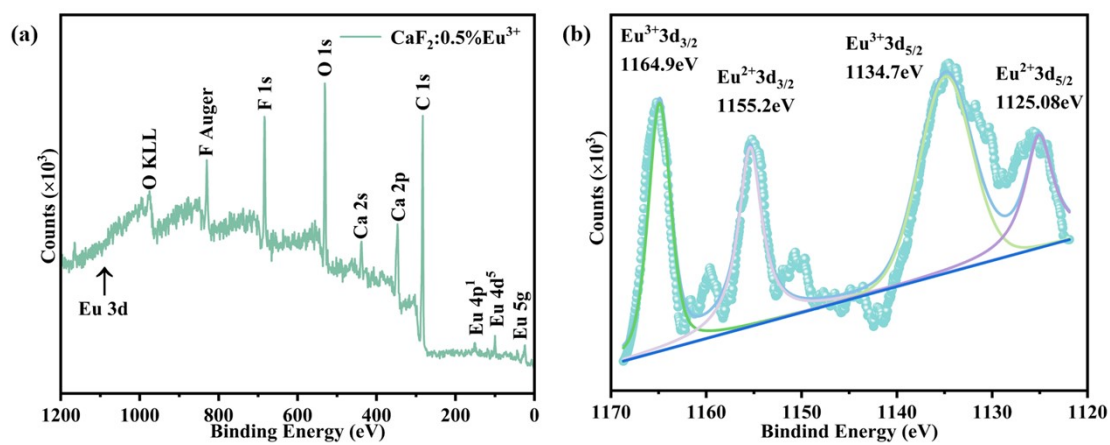

**Fig. S2.** XPS spectra of  $\text{CaF}_2: 0.5\% \text{Eu}$ : (a) survey, (b) high-resolution scans of Eu 3d.

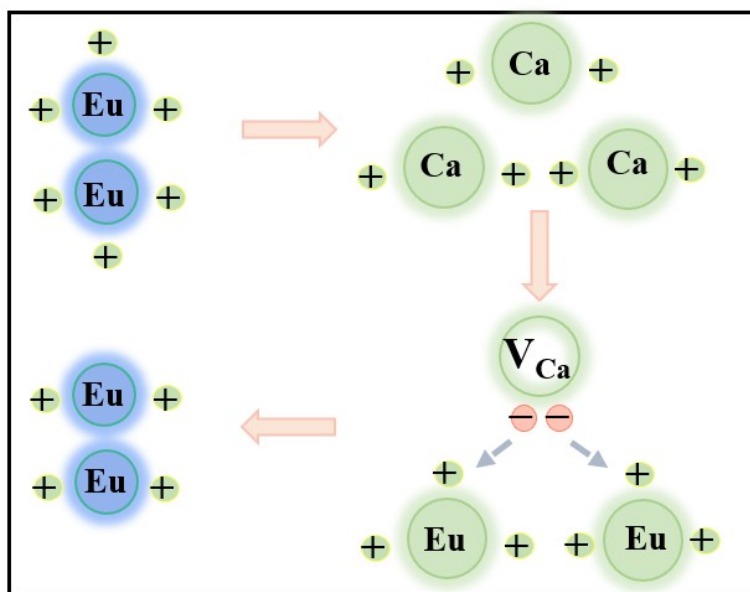

**Fig. S3.** The schematic diagram of the  $\text{Eu}^{3+}$  self-reduction principle.

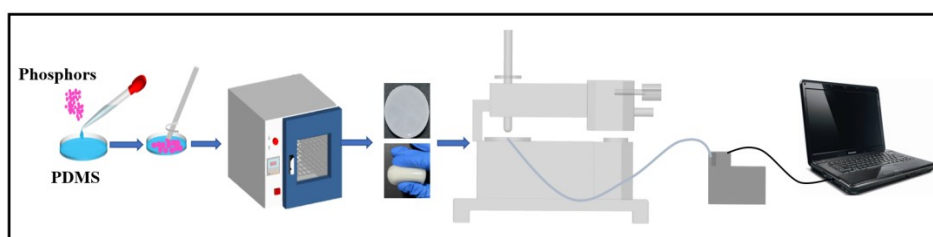

**Fig. S4.** Schematic diagram depicting the ML measurement for the  $\text{CaF}_2: x\% \text{Eu}^{3+} @ \text{PDMS}$  ( $x = 0.1, 0.25, 0.5\%, 0.75,$  and  $1$ ) film.

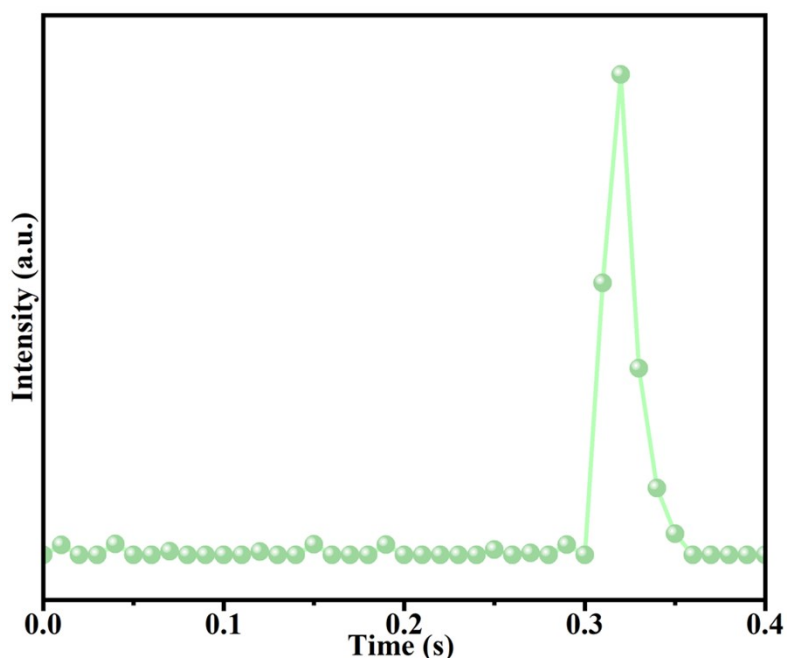

**Fig. S5.** The response speed of  $\text{CaF}_2: 0.5\% \text{Eu} @ \text{PDMS}$  to mechanical stimuli.

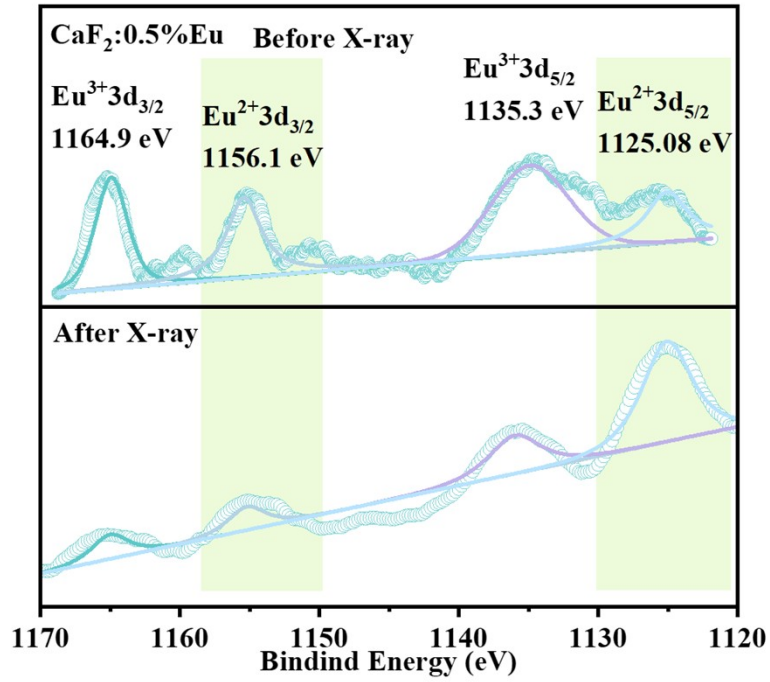

**Fig. S6.** XPS spectra of  $\text{CaF}_2:0.5\%\text{Eu}$  before and after x-ray irradiation.

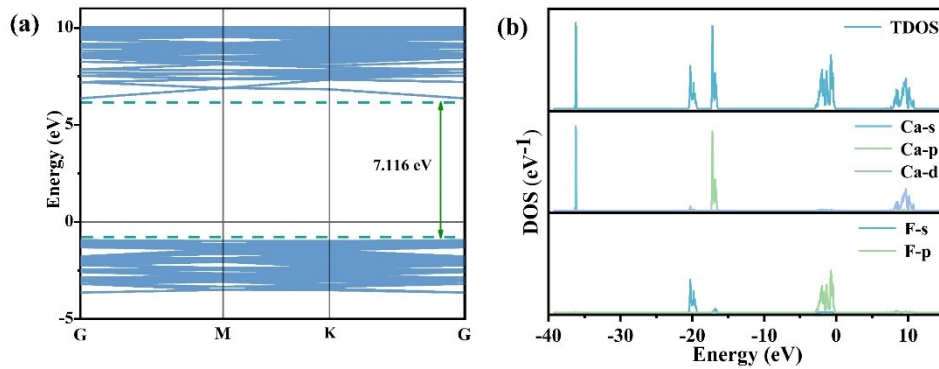

**Fig. S7.** (a) The band structure, (b) the total DOS and partial DOS of the  $\text{CaF}_2$  host.

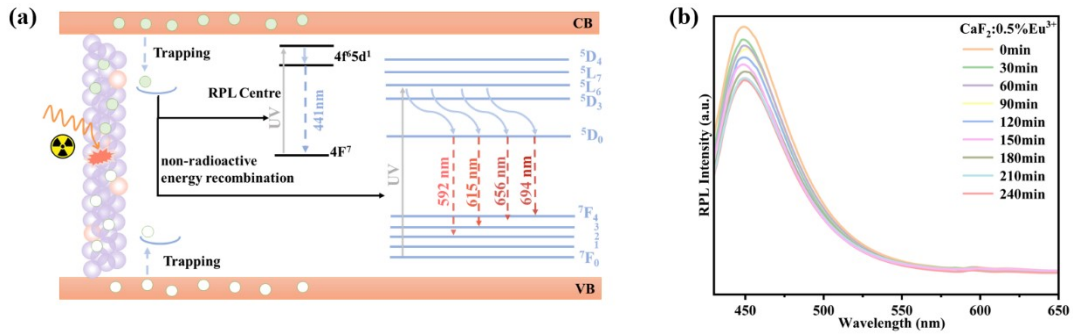

**Fig. S8.** (a) The mechanism of RPL phenomenon. (b) Standing for different times after X-ray irradiation.
